# Supplementary material for: Scalable production of wrinkled and few-layered graphene sheets and their use for oil and organic solvent absorption
Source: Royal Society of Chemistry journal article supplement (doi:10.1039/c4cp05864j), 2015-01-01
Supplement: c4cp05864j1.pdf [file c4cp05864j1.pdf]

## Supporting Information

### **Scalable production of wrinkled and few-layered graphene sheets and their use for oils and organic solvents absorption**

*Dan Liu, Weiwei Lei,\* and Ying (Ian) Chen\**

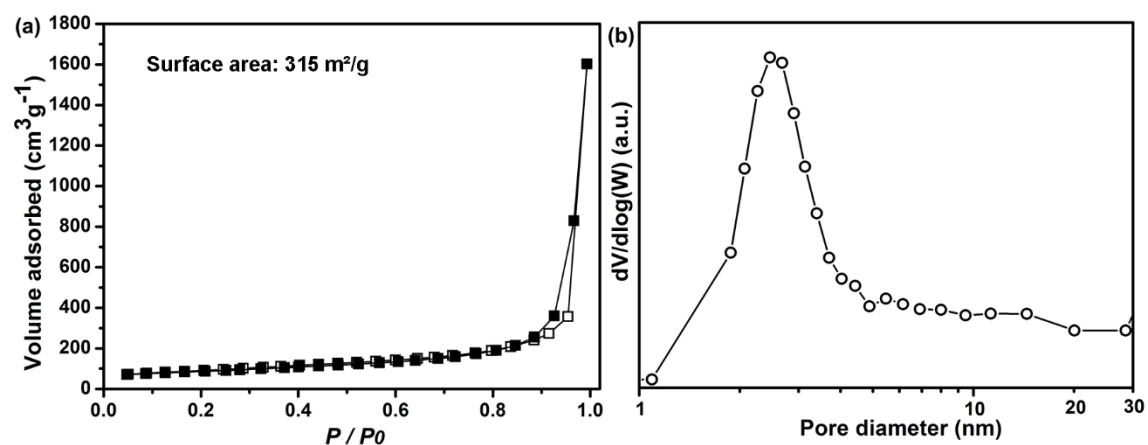

**Figure S1.** Nitrogen adsorption–desorption isotherm and the distribution of pore size of pristine graphite after milled 20h and heating at 800 oC.
